# Supplementary material for: Directional interactions in semiflexible single-chain polymer folding
Source: Royal Society of Chemistry journal article supplement (doi:10.1039/c2sm25832c), 2012-01-01

Electronic Supplementary Information for

## Directional Interactions in Semiflexible Single-chain Polymer Folding

Pablo Englebienne, Peter A. J. Hilbers, E. W. Meijer, Tom F. A. De Greef and Albert J. Markvoort

### Contents

|                                                                                                                                                                                                                                                                                                                                                                                                                               |   |
|-------------------------------------------------------------------------------------------------------------------------------------------------------------------------------------------------------------------------------------------------------------------------------------------------------------------------------------------------------------------------------------------------------------------------------|---|
| Figure S1. Structural properties of 100-mer polymers. Left: homopolymers with all beads interacting with a LJ126 potential. Right: co-polymers with a directional (LJA2) bead on every 5 <sup>th</sup> bead. A: histograms of structural properties as a function of reduced temperature; B: histograms of structural properties at three specific reduced temperatures, namely $T=0.5$ , $T \approx T_c$ and $T=2.5$ . ..... | 2 |
| Figure S2. Contact maps of 100-mer polymers at different values of $k_{\text{bend}}$ . Left: homopolymers with all beads interacting with a LJ126 potential (contacts are evaluated between beads at every 5 <sup>th</sup> position). Right: co-polymers with a directional (LJA2) bead on every 5 <sup>th</sup> bead (contacts are evaluated for every directional bead). ..                                                 | 3 |
| Figure S3. Representative structures of 100-mer polymers at different reduced temperatures and different values of $k_{\text{bend}}$ . Left: homopolymers with all beads interacting with a LJ126 potential. Right: co-polymers with a directional (LJA2) bead on every 5 <sup>th</sup> bead. ....                                                                                                                            | 4 |

**Figure S1.** Structural properties of 100-mer polymers. Left: homopolymers with all beads interacting with a LJ126 potential. Right: co-polymers with a directional (LJA2) bead on every 5<sup>th</sup> bead. A: histograms of structural properties as a function of reduced temperature; B: histograms of structural properties at three specific reduced temperatures, namely  $T=0.5$ ,  $T \approx T_c$  and  $T=2.5$ .

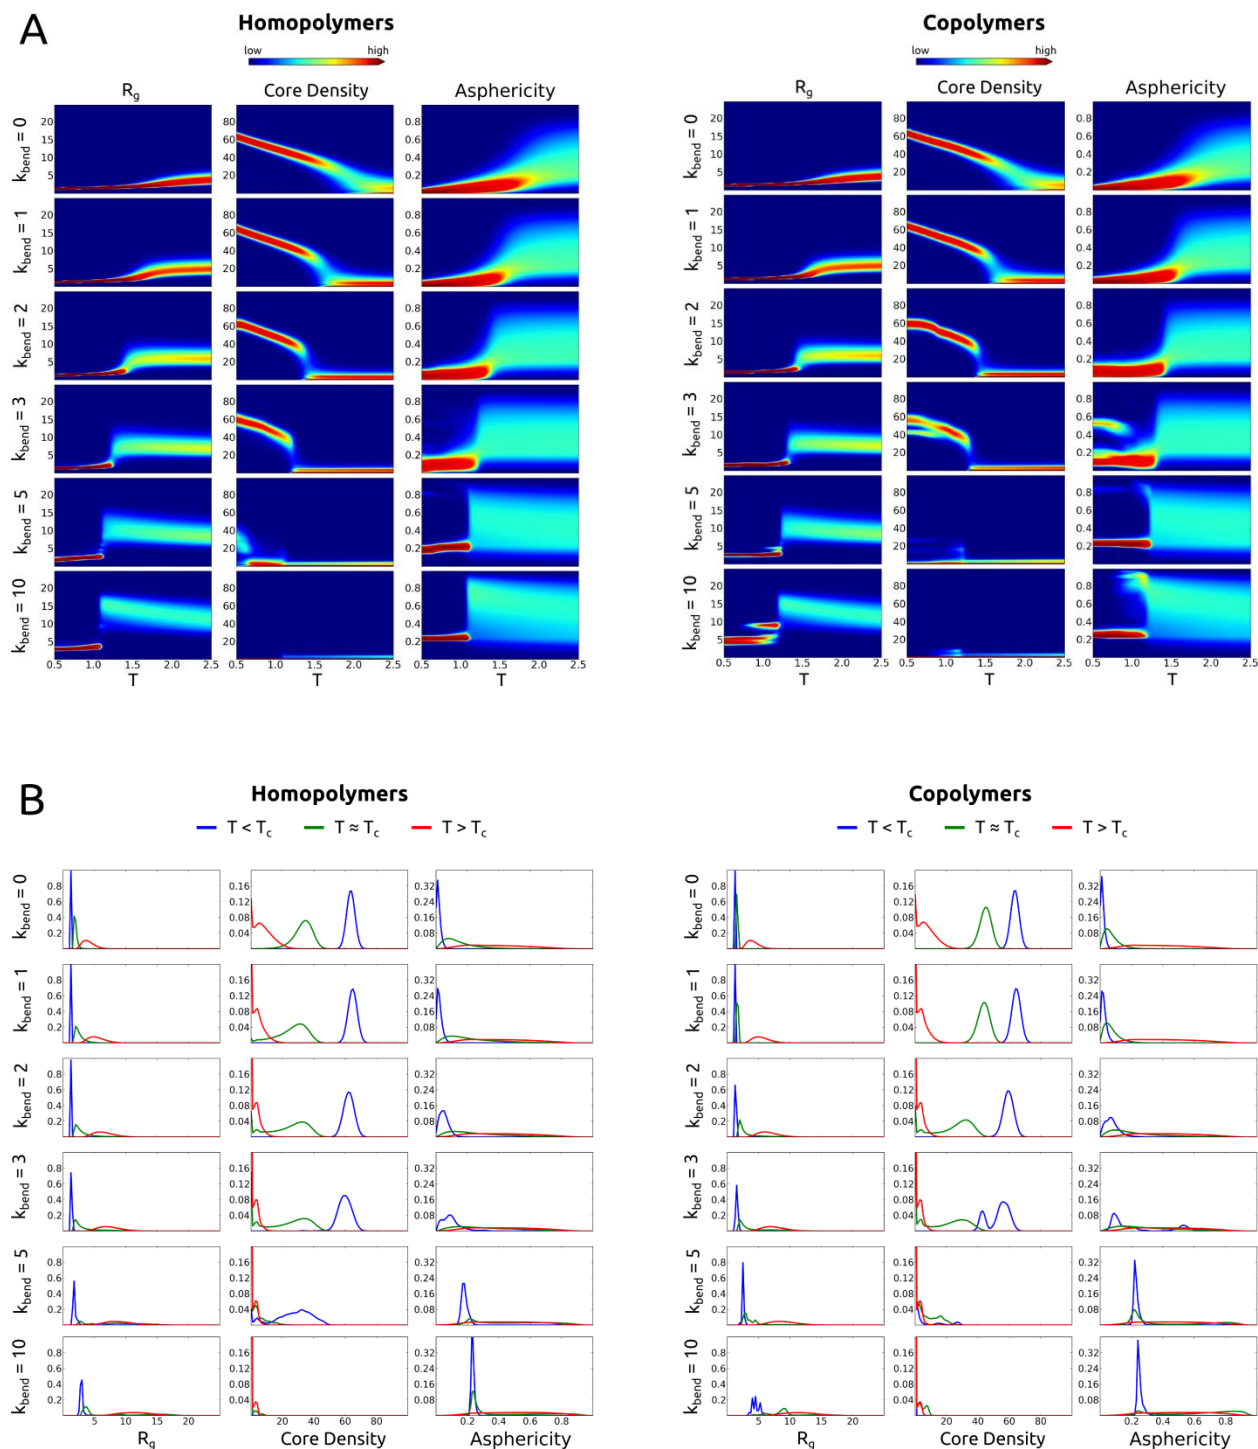

**Figure S2.** Contact maps of 100-mer polymers at different values of  $k_{\text{bend}}$ . Left: homopolymers with all beads interacting with a LJ126 potential (contacts are evaluated between beads at every 5<sup>th</sup> position). Right: co-polymers with a directional (LJA2) bead on every 5<sup>th</sup> bead (contacts are evaluated for every directional bead).

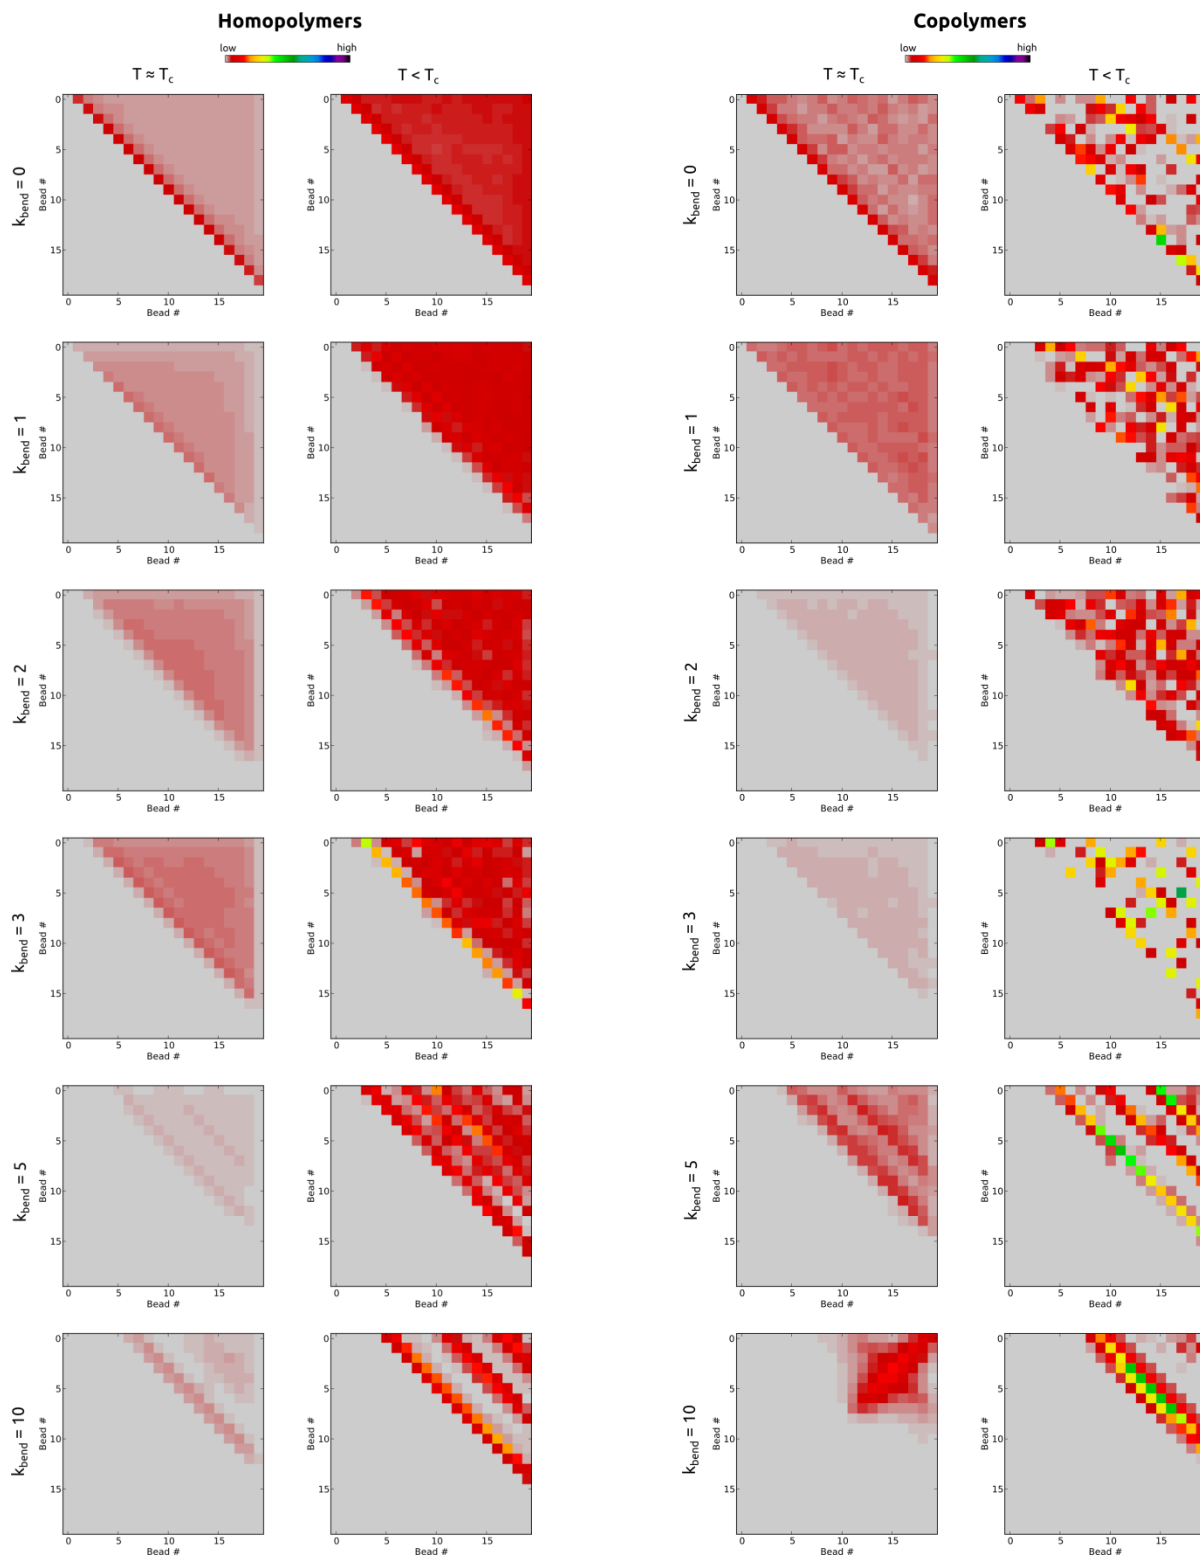

**Figure S3.** Representative structures of 100-mer polymers at different reduced temperatures and different values of  $k_{\text{bend}}$ . Left: homopolymers with all beads interacting with a LJ126 potential. Right: co-polymers with a directional (LJA2) bead on every 5<sup>th</sup> bead.

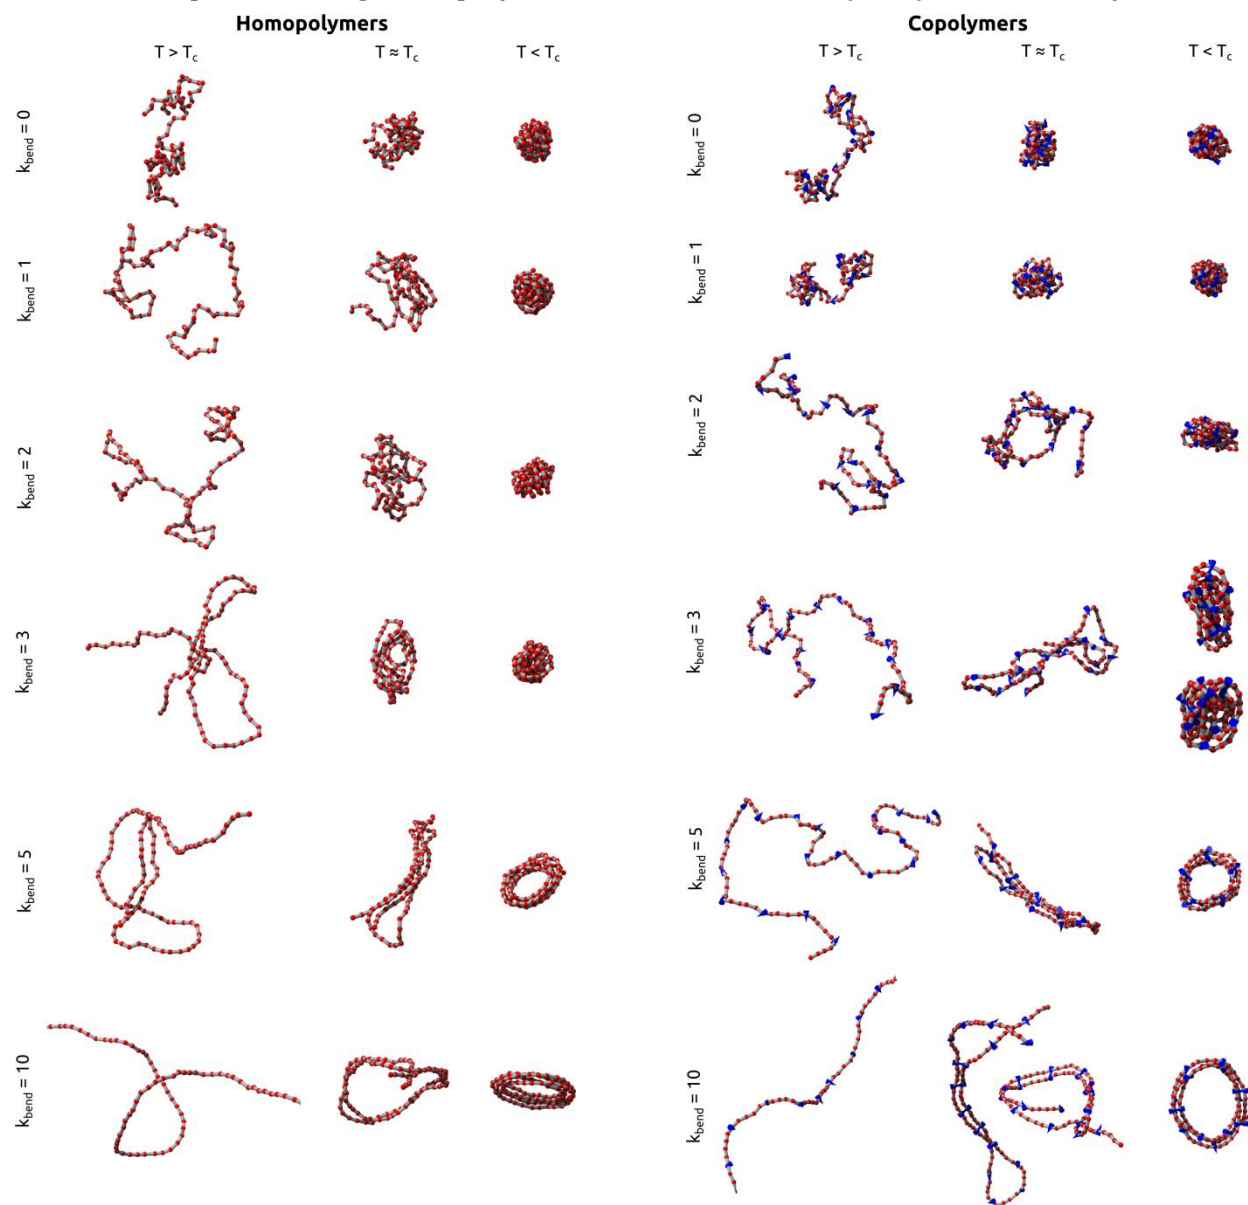

Supplement: c2sm25832c.pdf [file c2sm25832c.pdf]
